# Supplementary material
Source: PubMed Central journal article supplement (PMC5811902)
Supplement: MRM-79-1817-s001.pdf [file MRM-79-1817-s001.pdf]

Supporting Table S1. Temperature stability range of the reverse hexagonal phase for samples with chemical compositions at and around the value chosen for the phantom.

| Chemical composition (wt%) |           |       | Temperature range (°C) |             |
|----------------------------|-----------|-------|------------------------|-------------|
| AOT                        | isooctane | water | Lower limit            | Upper limit |
| 47.91                      | 15.12     | 36.97 | <5                     | 29.0        |
| 46.00                      | 14.52     | 39.47 | <5                     | 30.0        |
| 44.70                      | 14.11     | 41.19 | <5                     | 30.0        |
| 44.12                      | 13.94     | 41.94 | <5                     | 31.0        |
| 43.43                      | 13.71     | 42.86 | <5                     | 31.5        |
| 41.79                      | 13.19     | 45.02 | <5                     | 32.0        |

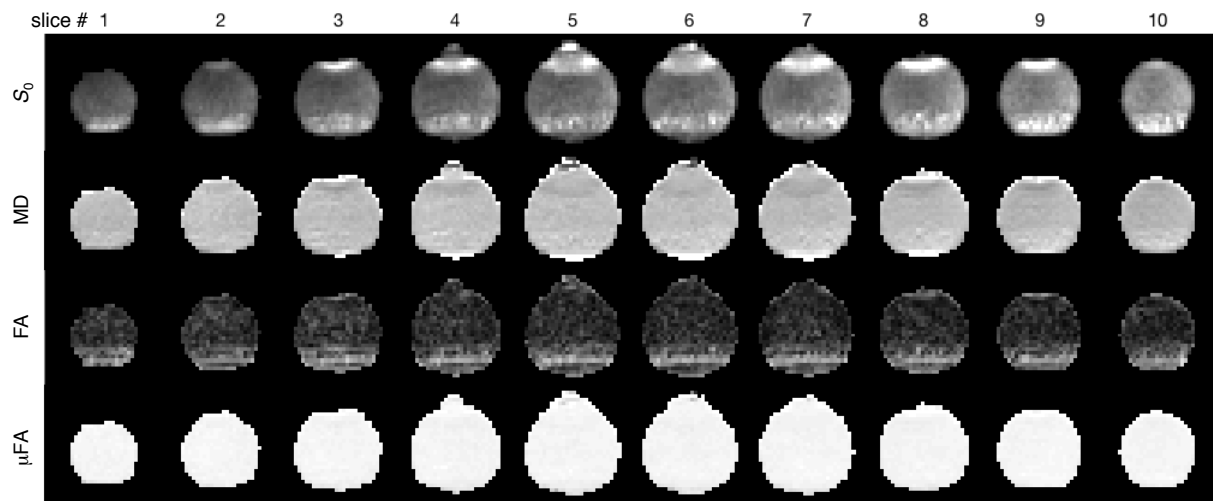

Supporting FIG. S1. Parameter maps for all slices of the experimental data in FIG. 4. The  $S_0$ , MD, and  $\mu$ FA maps were obtained with the *gamma* model, while the FA map is from standard *DTI* analysis. The gray scales have the same meanings as in FIG. 4.

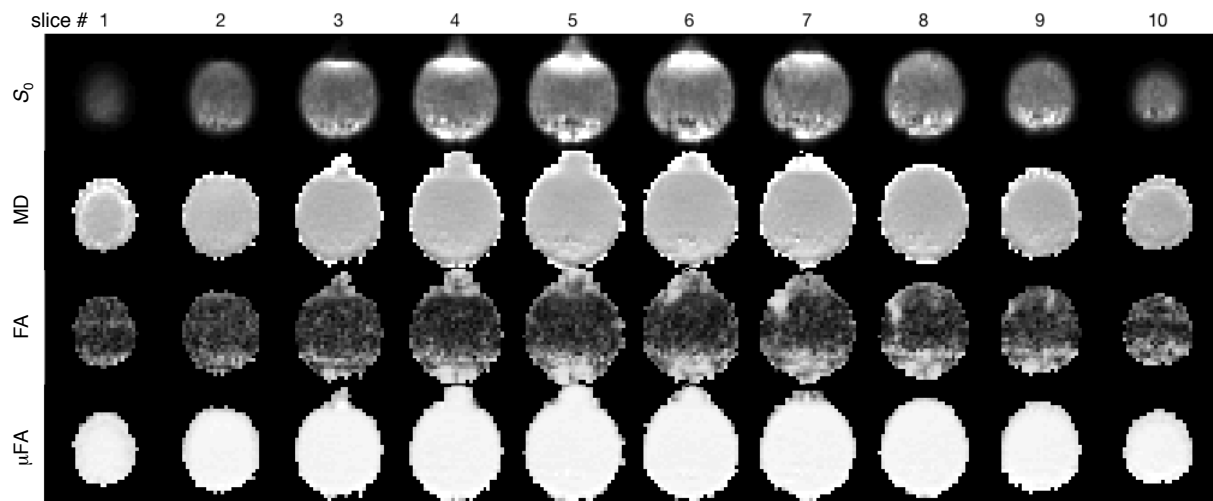

Supporting FIG. S2. Demonstration of the long-time stability of the phantom. The data was acquired one year after the original measurements reported in FIG. 4 and Supporting FIG. S1 using the same scanner, experimental settings, and data processing pipeline. The gray scales have the same meanings as in FIG. 4. Note that the  $\mu$ FA maps remain uniform with values near unity.

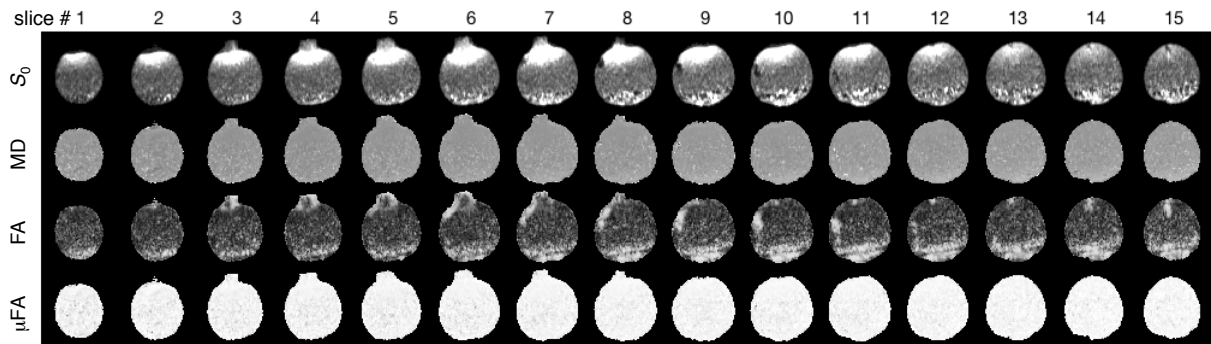

Supporting FIG. S3. Application of the phantom on a conventional MR scanner. The data was acquired with the same phantom in Supporting FIG. S2 using a conventional Siemens Magnetom Prisma 3T scanner with  $0.080 \text{ Tm}^{-1}$  maximum gradient strength and  $200 \text{ Tm}^{-1}\text{s}^{-1}$  slew rate at a spatial resolution of  $2.0 \times 2.0 \times 4.0 \text{ mm}^3$  using an optimized acquisition protocol as described in Ref. (98). The data processing pipeline and visualization was the same as in Supporting FIG. S1. Note the uniformity of the  $\mu\text{FA}$  maps with values near unity.
